# Supplementary material for: Dynamics and composition of the Asian summer monsoon anticyclone
Source: Copernicus journal article supplement (doi:10.5194/acp-2017-420), 2017-06-23
Supplement: Supplementary file 1 [file acp-2017-420-supplement.pdf]

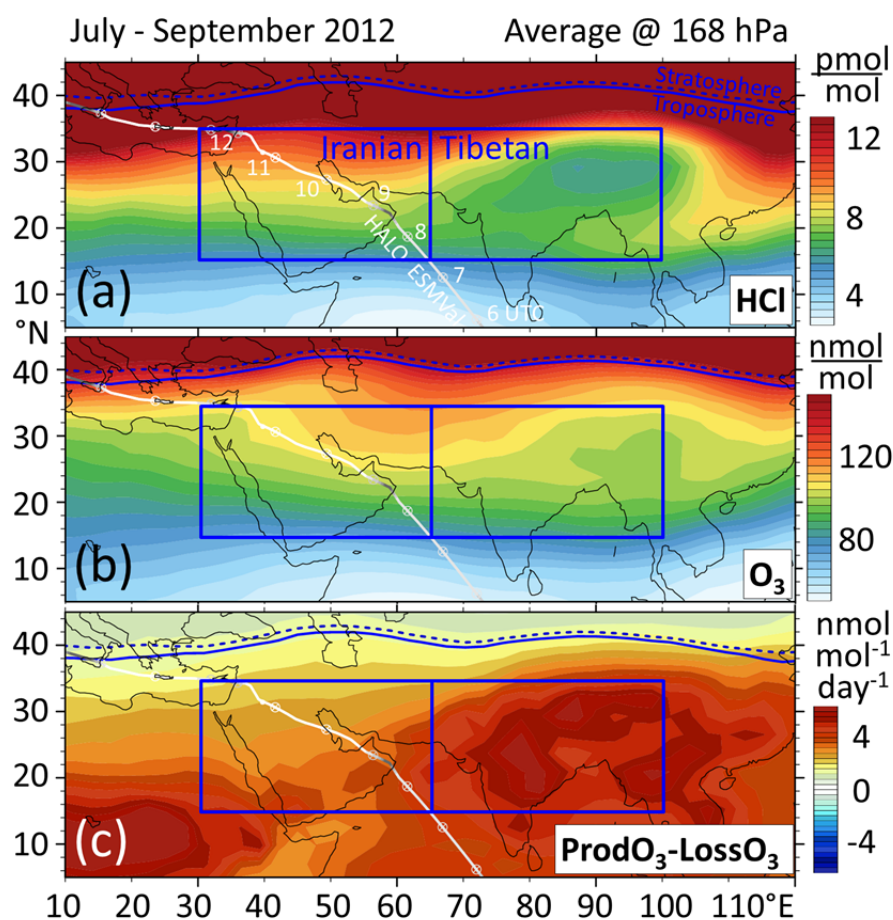

Figure S1. Trace gas mixing ratios and net  $O_3$  production as simulated by EMAC at 168 hPa for the monsoon months of 2012. The Iranian and Tibetan domains correspond to the regions used for lateral averaging throughout the paper (e.g. Figs. 2 - 5, S4 - S10). The Iranian region was traversed by the HALO ESMVal campaign during a flight from Male (Maledives) to Larnaca (Cyprus) on 18 September 2012. HALO was flying in the upper troposphere where the flight track is colored white and dived to the lower troposphere where it is grey. Beads show the HALO positions at full UTC hours.

10

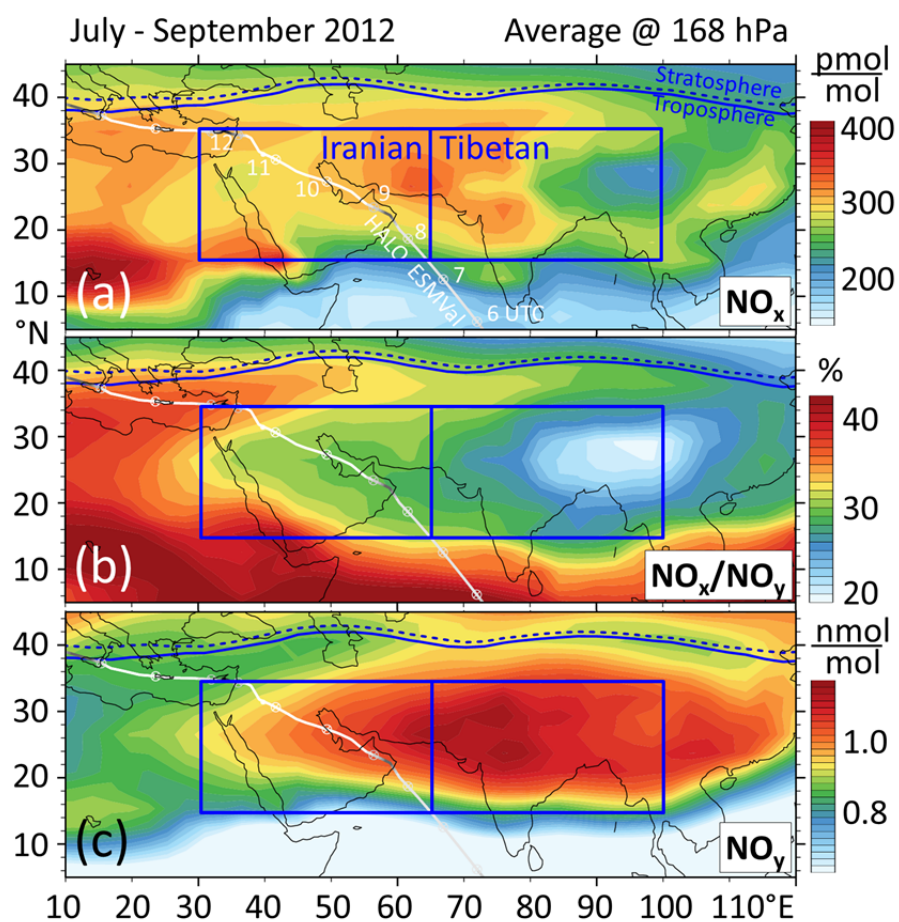

11

12

Figure S2. As Fig. S1, but for different tracers.

13

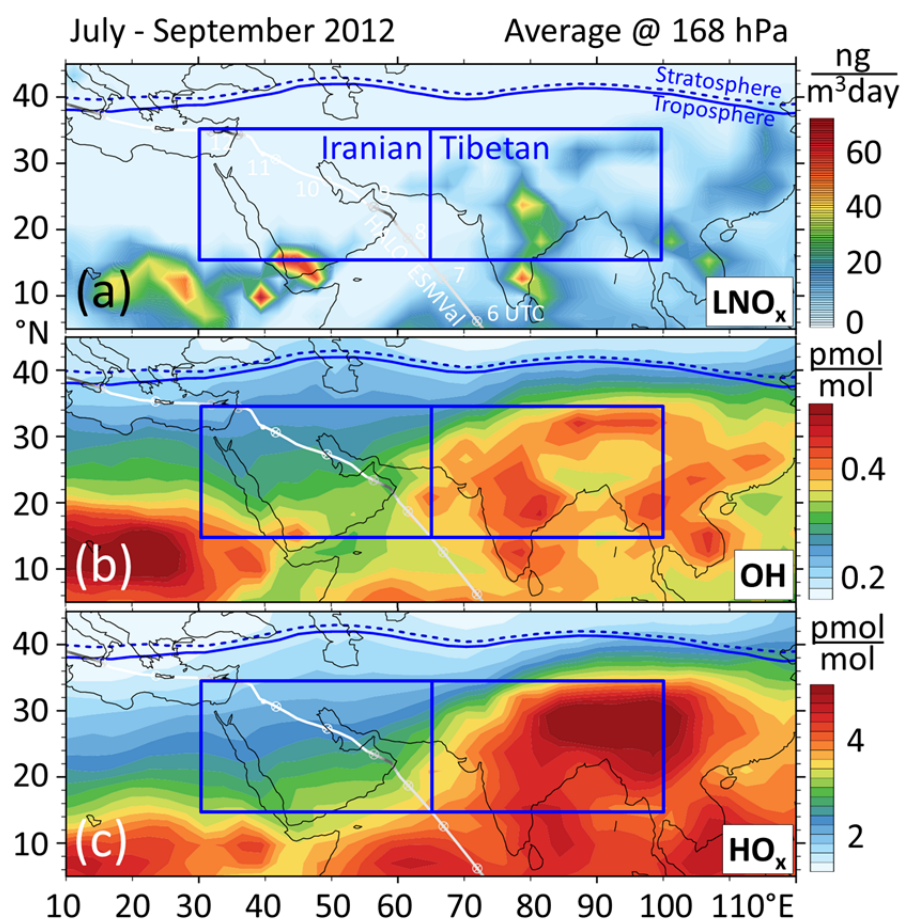

Figure S3. As Fig. S1, but for different tracers.

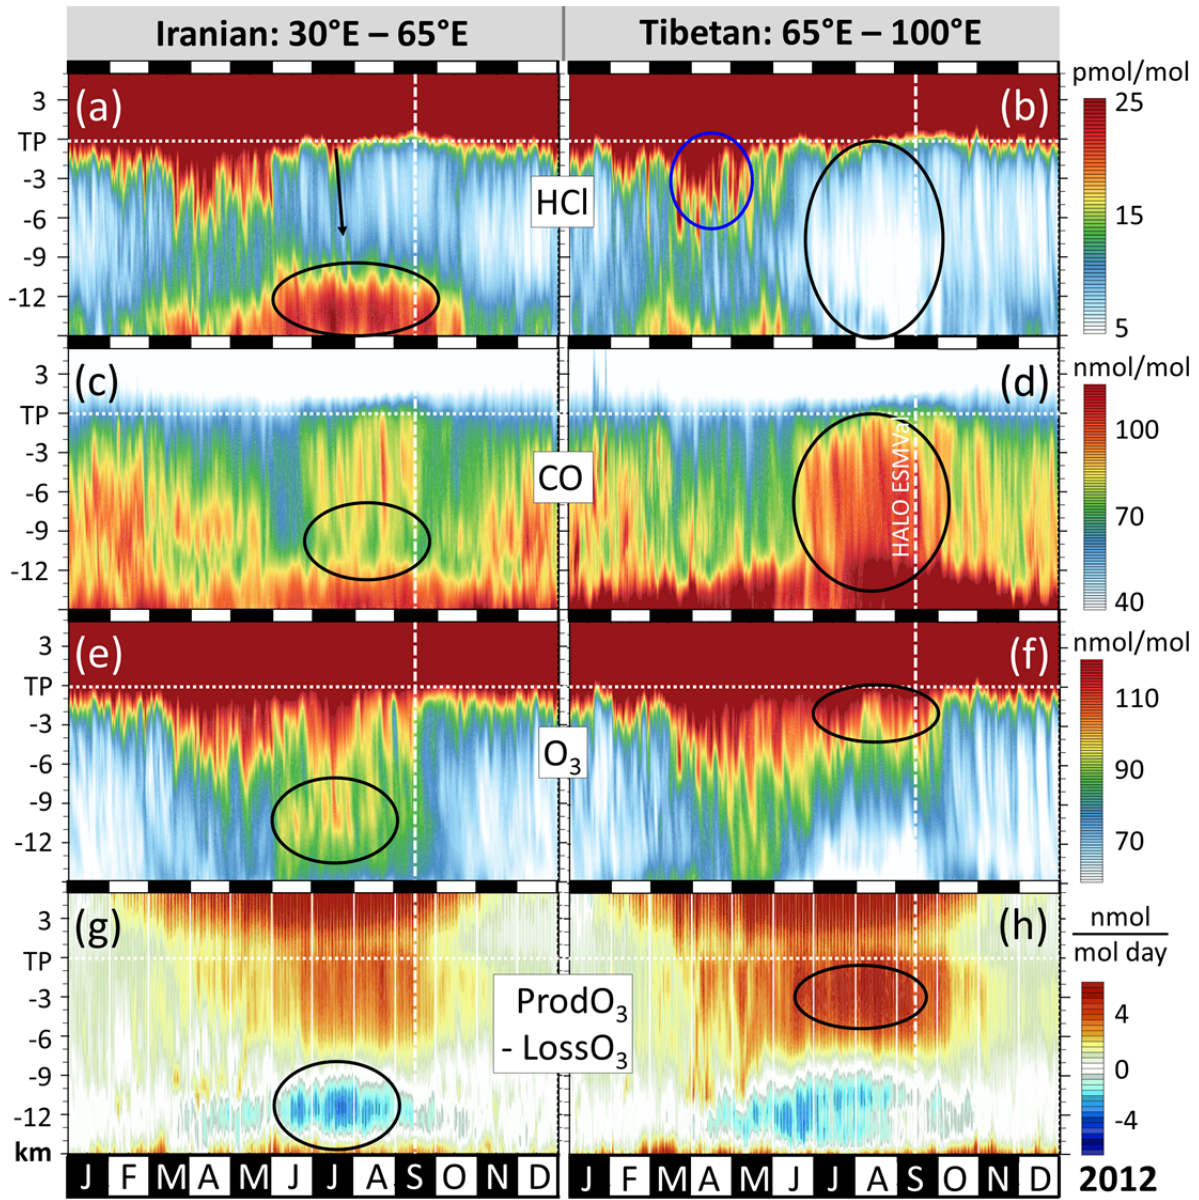

Figure S4. Evolution of simulated trace gas profiles and related diagnostics throughout 2012 in the ASMA region. Figure S4 is identical to Fig. 2, except that vertical coordinates are given as distance to the tropopause (“TP”) here. Compared to the pressure-based vertical axis’ used in Fig. 2, the tropopause region is resolved better here – at the expense of the middle troposphere. All values are grid-cell dry air mass weighted averages from 15°N to 35°N, respectively for the western (30° - 65°E) and eastern (65° - 100°E) parts of the ASMA (see Figs. 1, S1, S2, S3). The features marked by circles and arrows are the same as in Fig. 2 and discussed in the text.



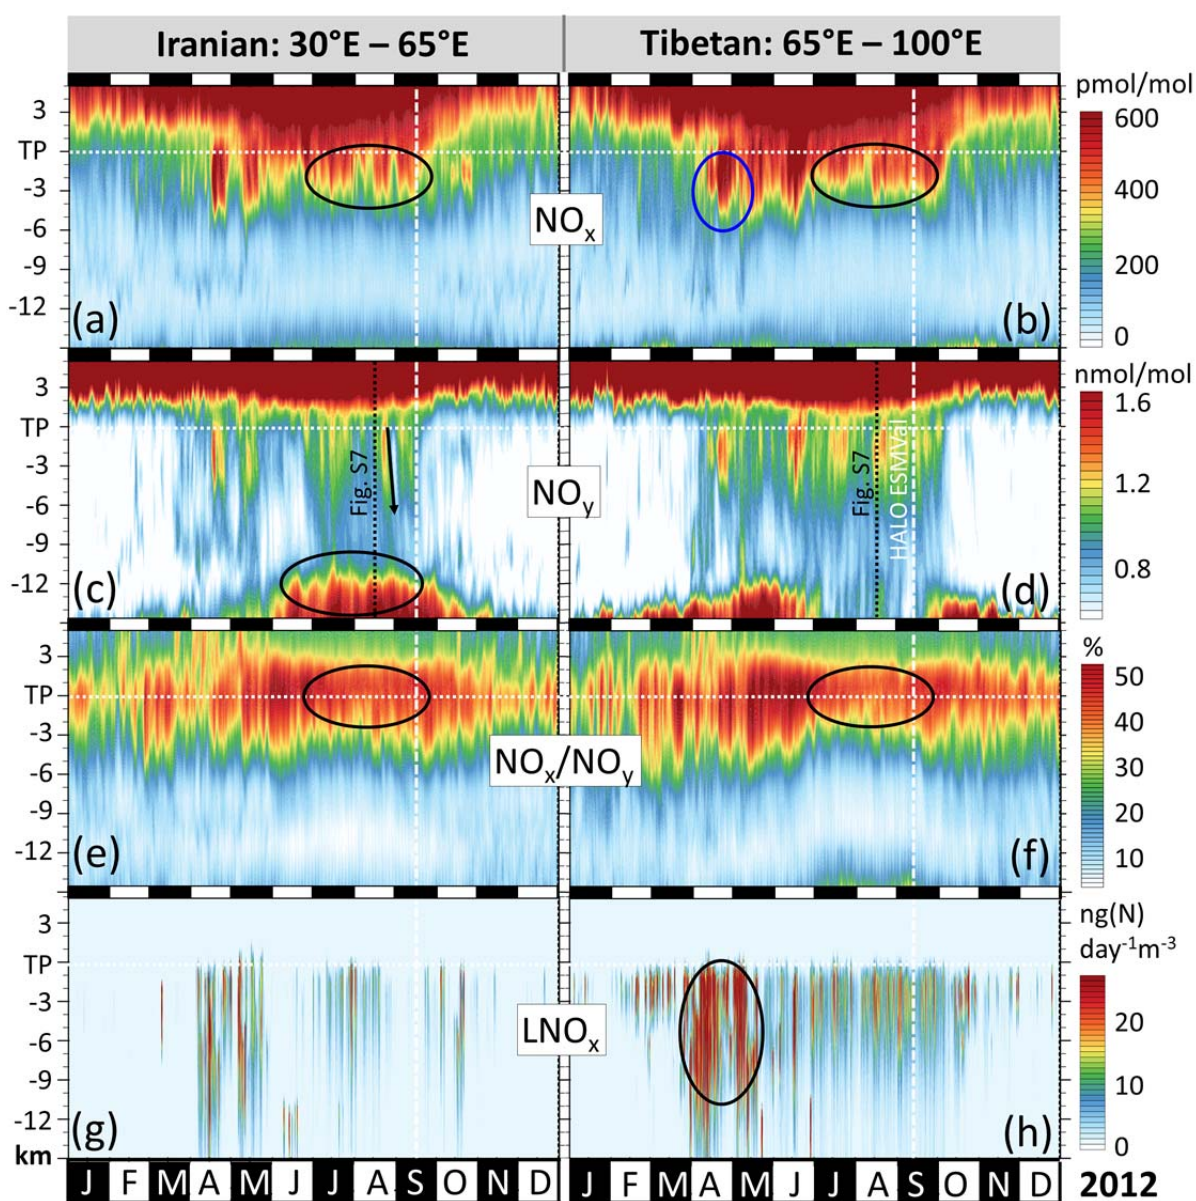

Figure S5. As Fig. S4, but for different tracers. The individual  $\text{NO}_y$ -profiles shown in Fig. S7 are indicated in panels c and d.

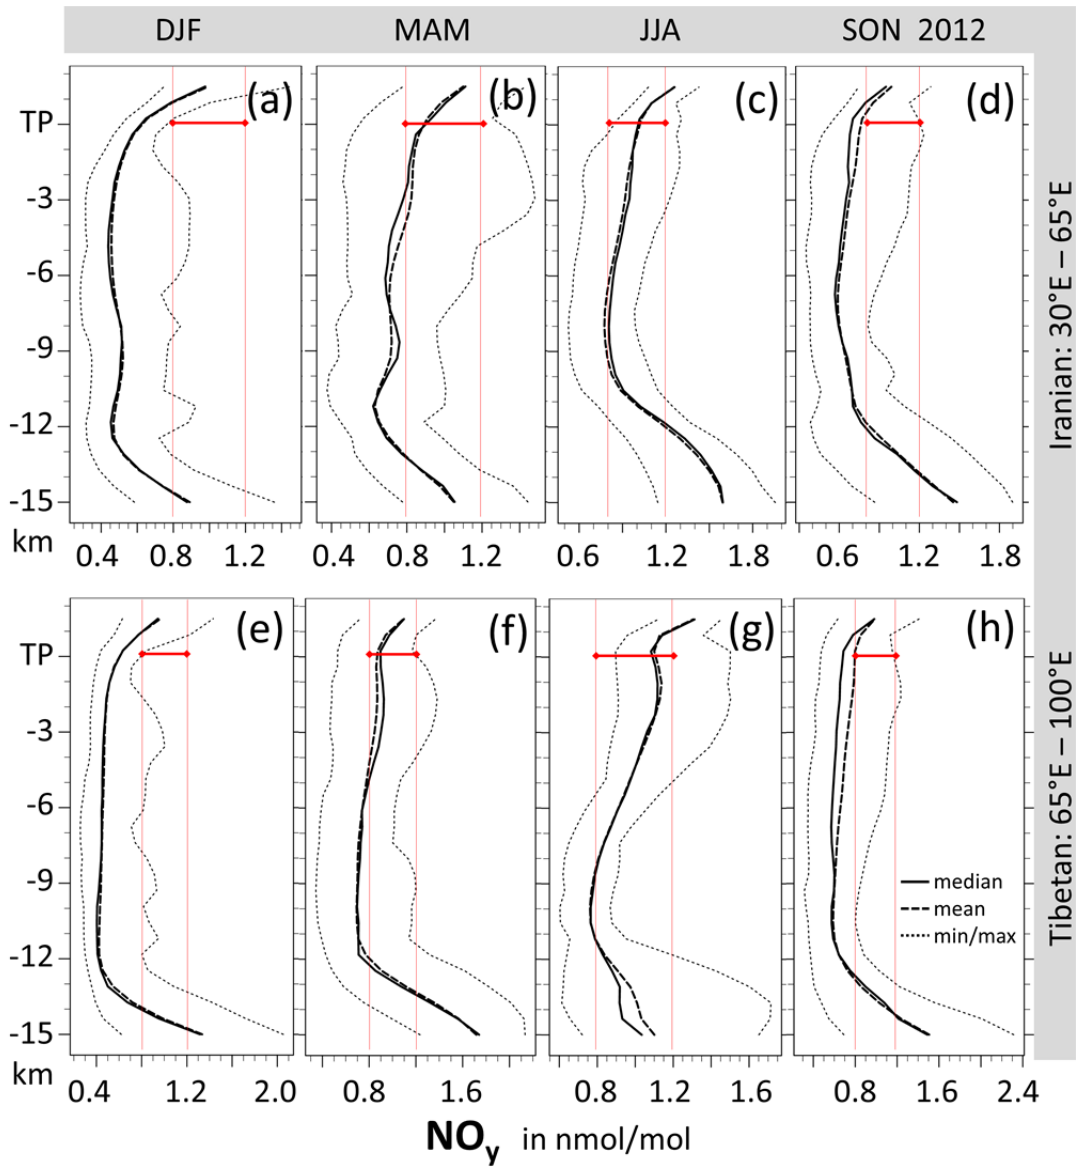

Figure S6. EMAC-simulated three-monthly mean  $\text{NO}_y$ -profiles in the Iranian and Tibetan regions, respectively. Note that the panels cover different ranges of  $\text{NO}_y$  mixing ratios. Auxiliary red lines always mark the interval 0.8 to 1.2 nmol/mol, as well as the tropopause in that interval.

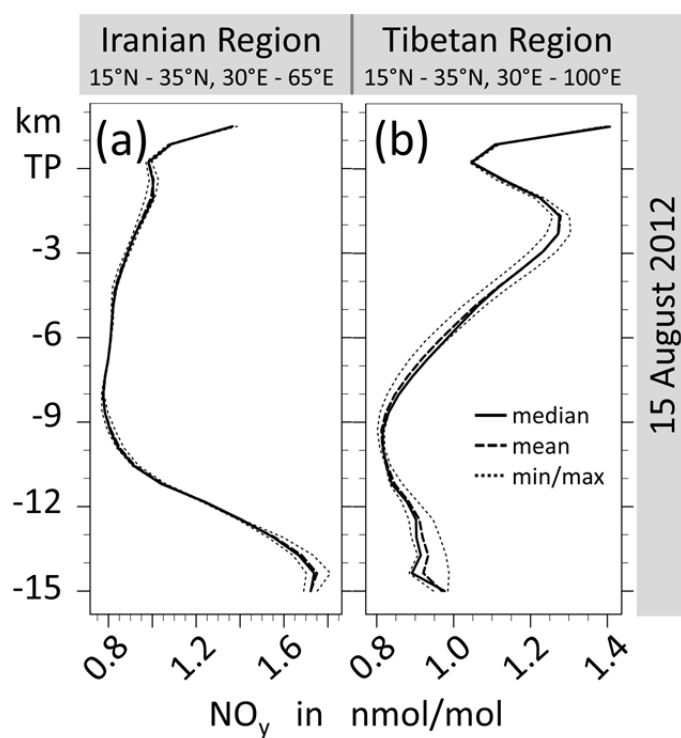

Figure S7. Simulated profiles of  $\text{NO}_y$  as simulated for 15 August 2012. These are examples of a C-shaped profile in the Iranian region (a) and an E-shaped profile in the Tibetan region (b).

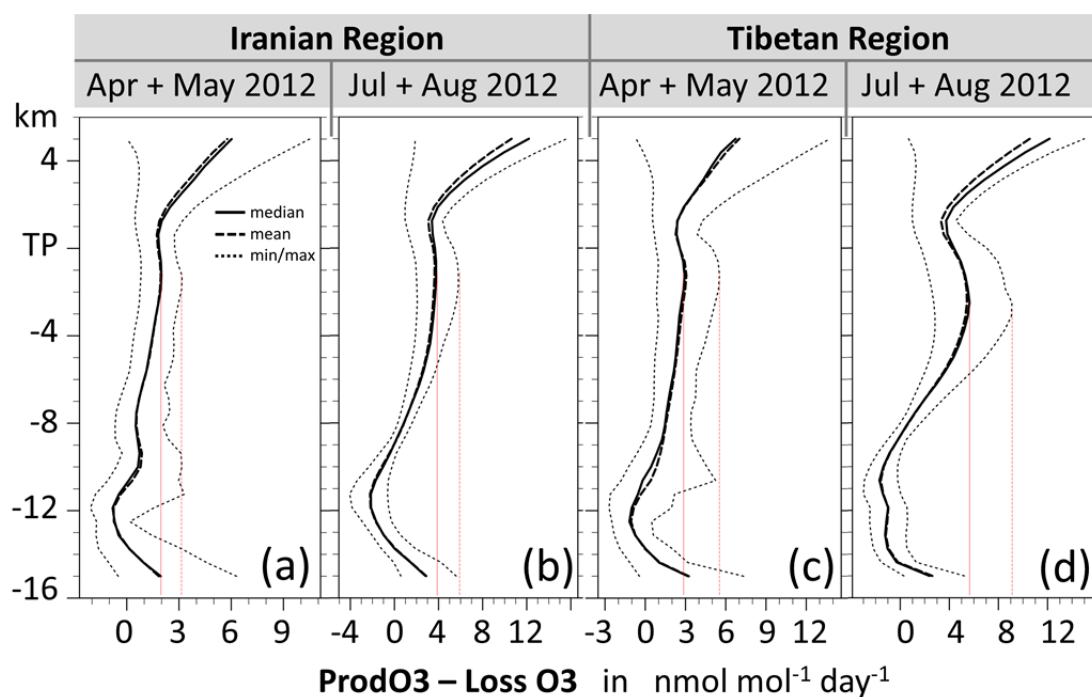

Figure S8. Simulated profiles of net  $O_3$  production in the Tibetan region. Auxiliary red lines indicate the mean and maximum net  $O_3$  production in the UT, which are both higher in summer than in spring. See also Fig. S4h for the evolution of these profiles throughout 2012.



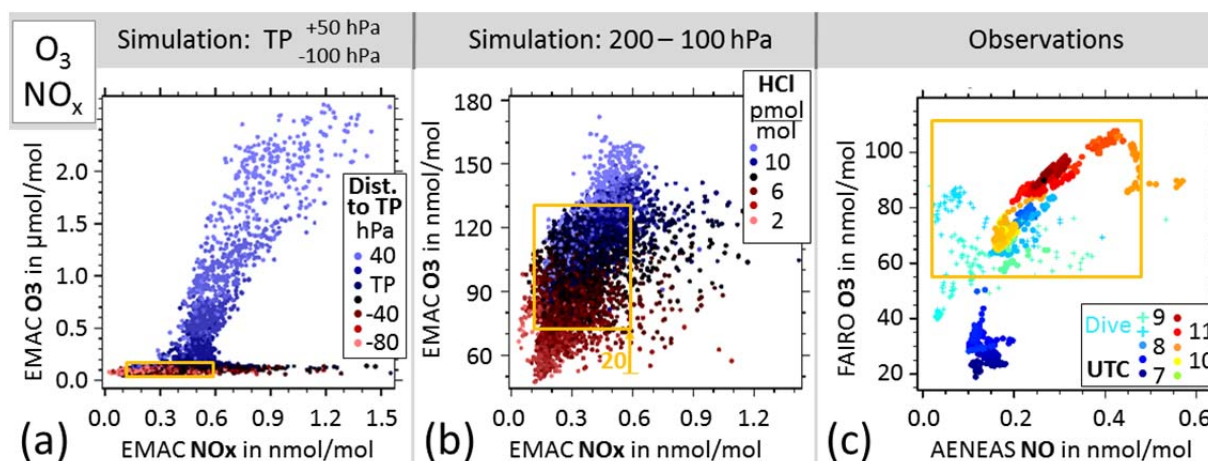

Figure S9. As Fig. 4, but for NO<sub>x</sub> vs O<sub>3</sub>. Panel (c) shows NO instead of NO<sub>x</sub>, because only NO was measured. At daytime, i.e. at the time of the measurements, NO is good proxy for NO<sub>x</sub>. Simulated O<sub>3</sub> and NO<sub>x</sub> increase in the stratosphere with a higher O<sub>3</sub>/NO<sub>x</sub> ratio than in the troposphere (Fig. S9a). At NO<sub>x</sub> mixing ratios of more than 0.7 nmol/mol the corresponding O<sub>3</sub> mixing ratios would allow distinguishing stratospheric influence from tropospheric in situ production, but the range covered by the HALO ESMVal measurements is just at the intersection of stratospheric and tropospheric branch (orange box in Fig. S9a). Similar HCl mixing ratios are simulated throughout the ranges of measured NO<sub>x</sub> and O<sub>3</sub> (orange box in Fig. S9b). Measurements of increased NO<sub>x</sub> in combination with increased O<sub>3</sub> (upper right corner of the orange boxes in Fig. S9) are compatible with both, increased in situ O<sub>3</sub> production and influence from the stratospheric branch. Consequently almost all measurements in the ASMA filament are well correlated on the scale of all our ASMA measurements (Fig. S9c). As discussed in the accompanying paper, the positive correlation between NO and O<sub>3</sub> is attributed to enhanced O<sub>3</sub> production due to increased NO, if NO also positively correlates with NO<sub>y</sub>.

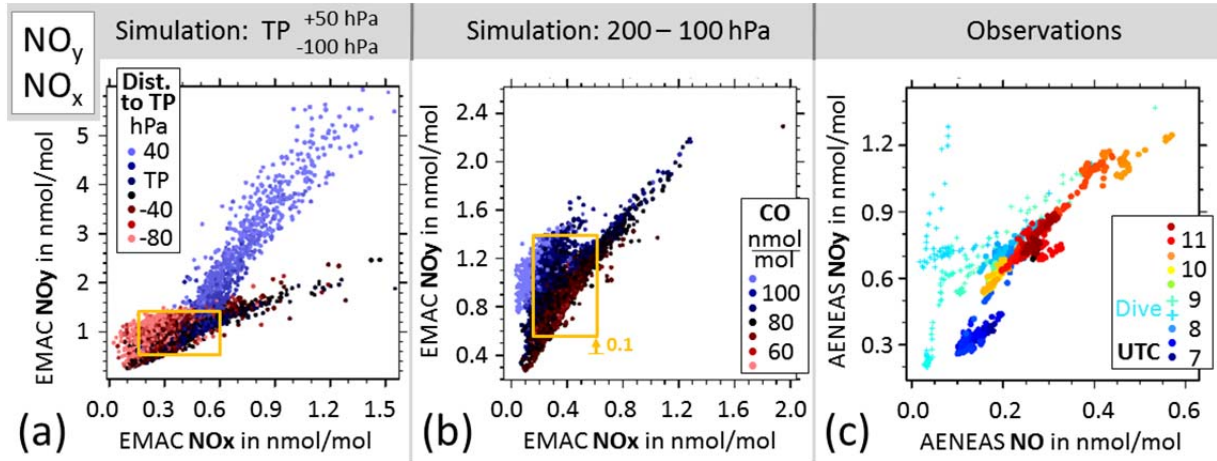

Figure S10. As Fig. S9, but for NO<sub>x</sub> vs NO<sub>y</sub>. There are three distinct regions in Fig. S10a: a blueish stratospheric branch, a dark TL branch, and a reddish UT region. As a consequence of the local NO<sub>y</sub> minimum directly above the tropopause (Figs. 3d, S5, S7), the most decreased NO<sub>y</sub> mixing ratios in Fig. S10a also show up in samples taken from near the tropopause. Measured NO and NO<sub>y</sub> values in the ASMA filament are well correlated (Fig. S10c), consistent with almost constant NO<sub>x</sub>/NO<sub>y</sub> ratios in the UT (Figs 3ef). Furthermore, the simulation shows much more scatter in NO<sub>x</sub>-vs-O<sub>3</sub> space than the observations. The narrow, linear distribution of the ASMA measurements in Figs. S9c and S10c indicates that all parts of the transected filament had similar sources of reactive nitrogen. This is consistent with Appendix A, where lightning is found to be the dominating source of reactive nitrogen in the ASMA. In the accompanying study is also shown that the filament had seen convection at the eastern ASMA flank three to five days before the measurements. Thus the gradients of NO and NO<sub>y</sub> in Fig. S9c and Fig. S10c can be explained by different amounts of lightning NO<sub>x</sub> of approximately the same age.

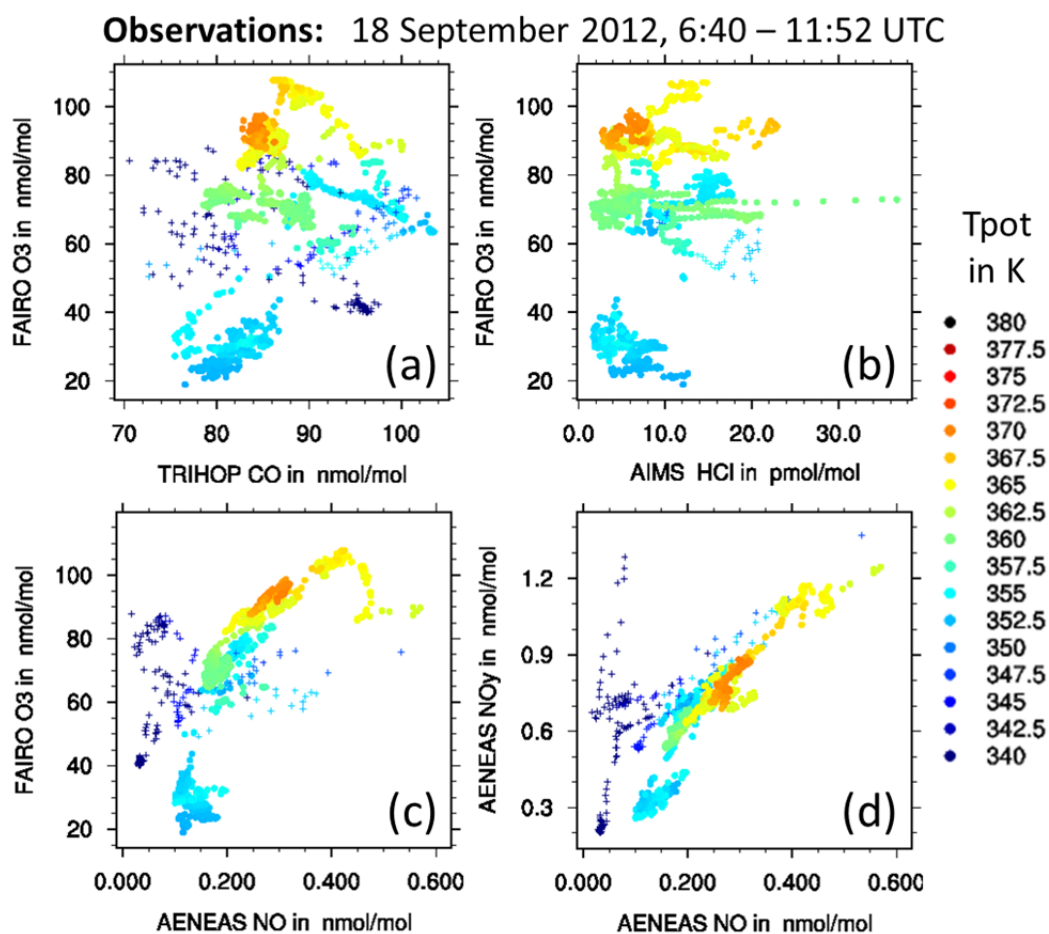

Figure S11. Panels a, b, c, d show measured data from the HALO ESMVal flight from Male to Larnaca as Figs. 4c, 5c, S9c, S10c, respectively. The only difference is that the samples here are color coded by their potential temperatures. During the dive (POI4: crosses) potential temperatures were lower than shown, but the color scale is cut off at 340 K. See also Fig. 7 and Fig. S12 for simulated potential temperatures in the ASMA region.

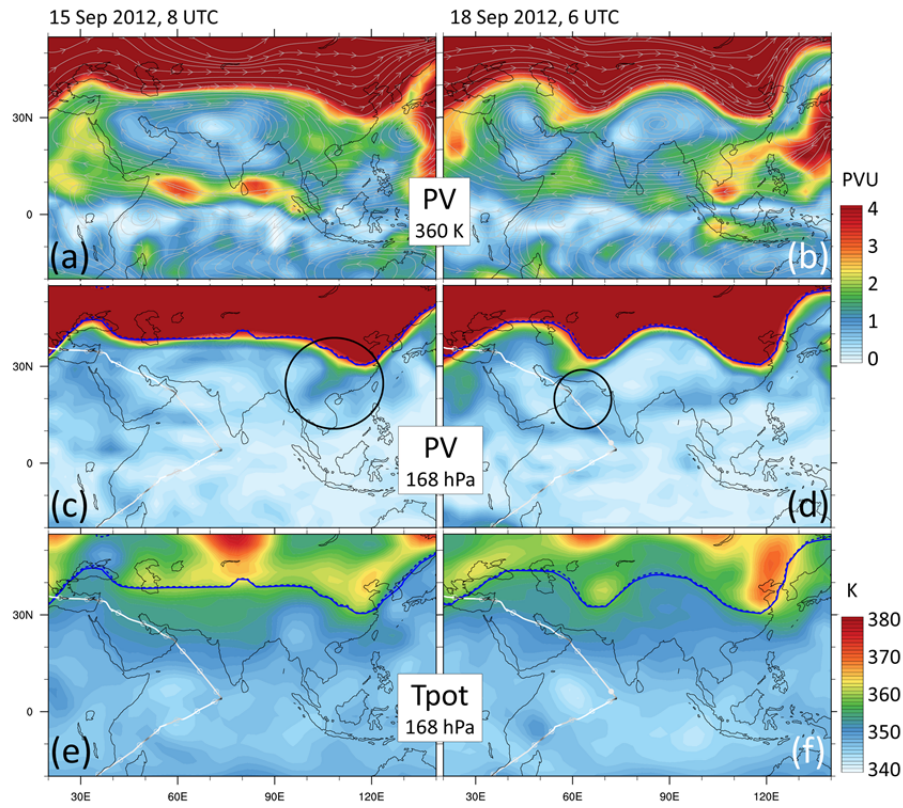

Figure S12. EMAC simulated potential vorticity at the 360 K isentropic level (panels a, b) and the 168 hPa pressure level (panels c, d). The black circle in panel c shows the entrainment of TL air, which occurred when the air mass corresponding to POI3 was passing the eastern ASMA flank. Panels b, d, f show simulated snapshots 2 hours before POI3, with the region of POI3 marked in panel d. The corresponding potential temperatures are shown in panels e and f. Note that TL layer entrainments are visible in PV, but are hardly detected by Tpot.



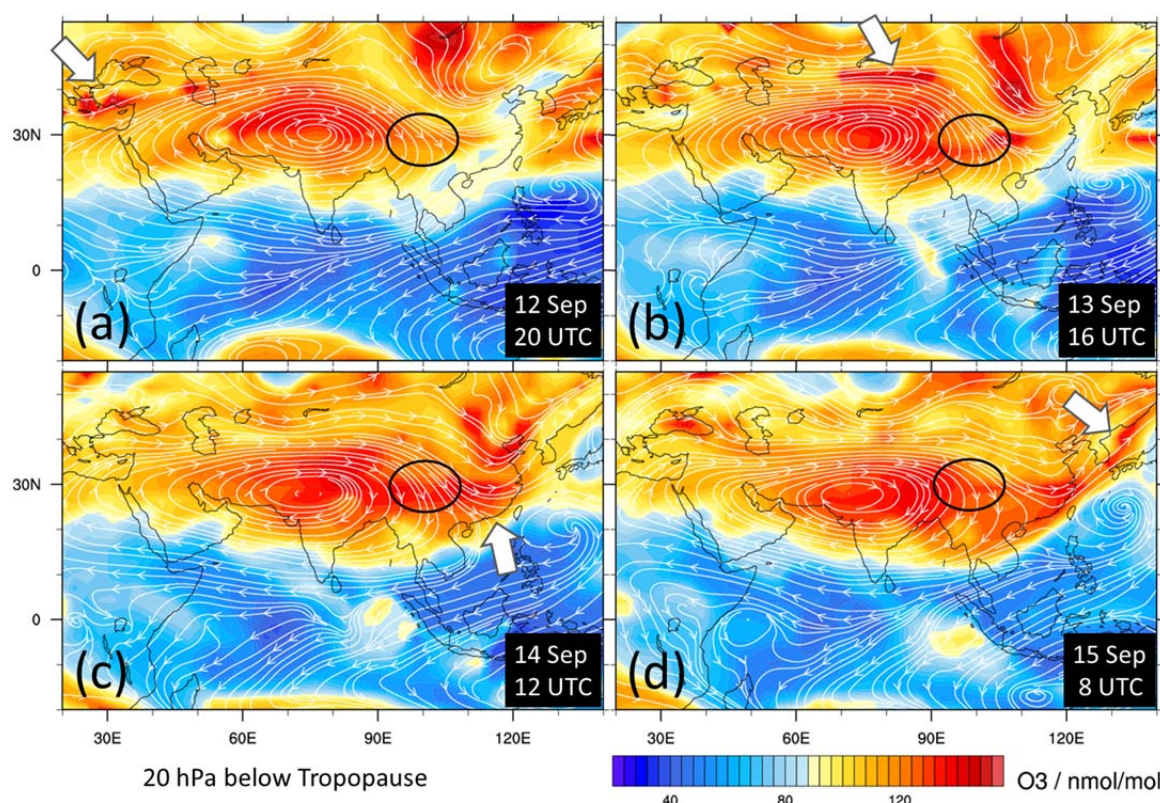

Figure S13. Sequence of  $\text{O}_3$  mixing ratios in the ASMA region and streamlines as simulated by EMAC for a layer 20 hPa below the tropopause. This layer was chosen to illustrate  $\text{O}_3$  variations and transport just below the TP. EMAC tropopause height varies spatially and temporally, as it is diagnosed each time step, according to the WMO definition between  $30^\circ\text{S}$  and  $30^\circ\text{N}$ , and by  $\text{PV} = 3.5$  PVU otherwise. Note that the layer may not, or may only partially show altitudes that contributed to the HALO measurements. The streamlines are based on instantaneous wind fields and thus not identical to backward trajectories. Grey arrows indicate a pocket of increased  $\text{O}_3$ , which originated in the tropopause folding region over the Eastern Mediterranean. It is picked up by the ASMA circulation and transported along the northern ASMA flank. The pocket passes the eastern ASMA flank before the time (last panel), when the air mass to be encountered by HALO arrived there (region indicated by black circles). However, a part of the increased  $\text{O}_3$  patch might have been entrained in the divergent flow there, diverted away from the TP and carried along the southern ASMA flank back east.

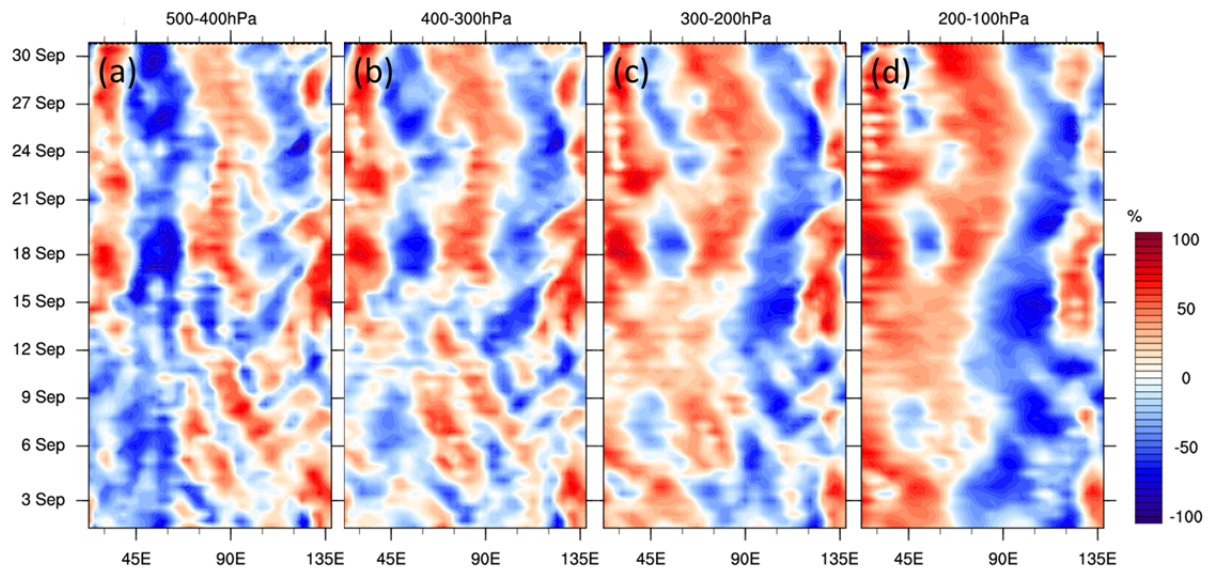

**Figure S14. Evolution of meridional wind fraction, as averaged over  $10^{\circ}\text{N} - 40^{\circ}\text{N}$  and the respective altitude range. The results are based on 10-hourly output of EMAC simulation RC1SD-base-10a for September 2012 in the ASMA region. Weighting considers the dry air mass in the cell, and completely or partly stratospheric cells are ignored. At a given time, each red-blue-pair (from left to right) represents an anticyclone, because positive values indicate overall northward meridional wind fractions. Blue shades represent mainly southward wind fractions.**



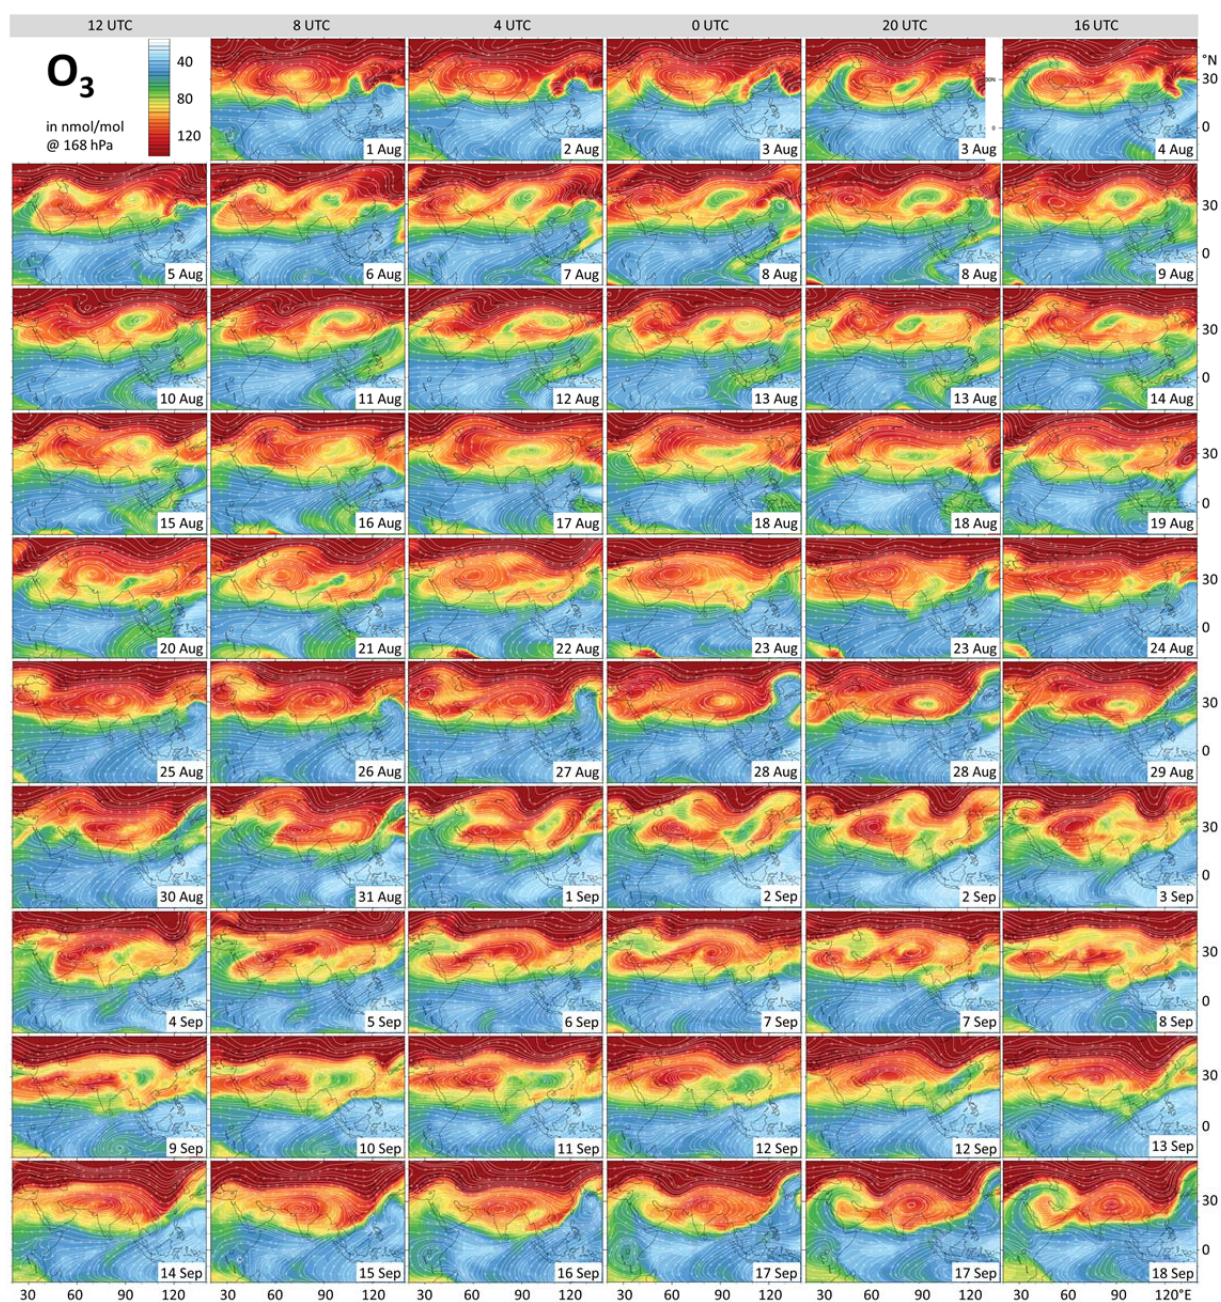

Figure S15. EMAC simulated  $O_3$  mixing ratios and streamlines at 168 hPa in the ASMA region. The snapshots are 20 hours apart and cover the period from 1 August to 18 September 2012.



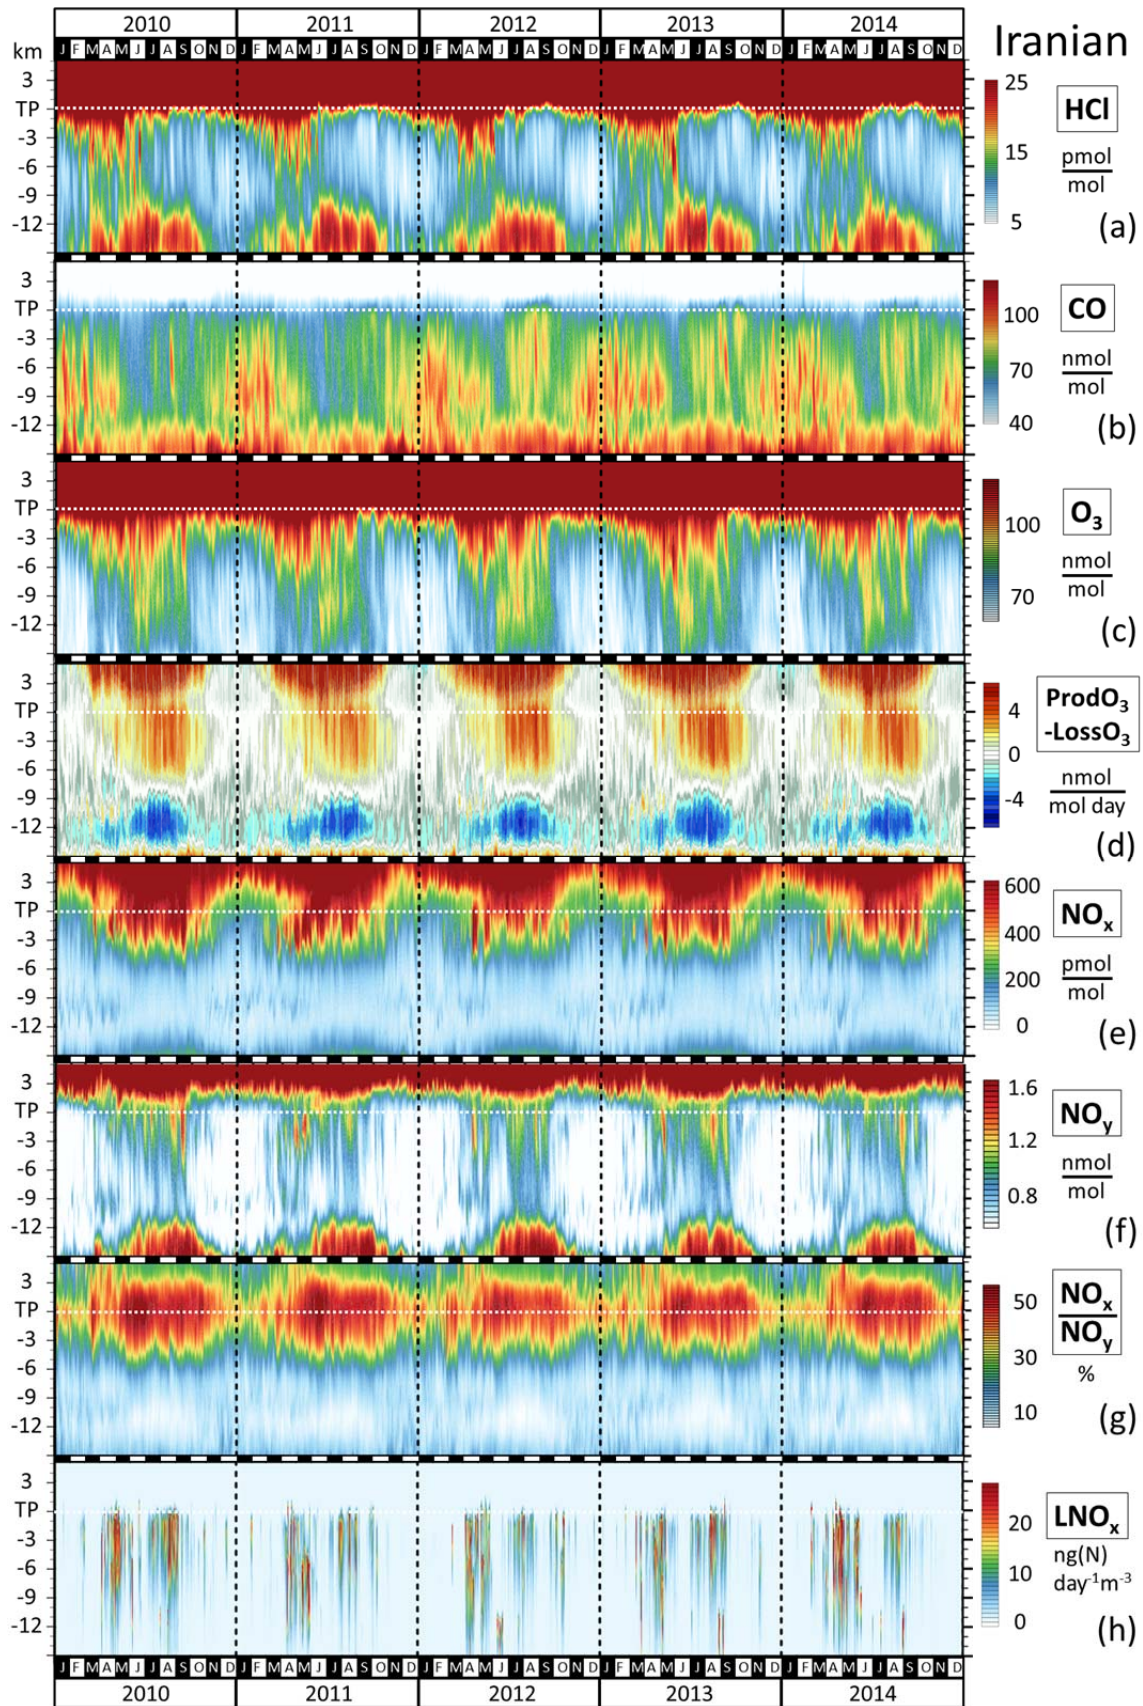

Figure S16. Evolution of simulated trace gas profiles and related diagnostics for the years 2010 - 2014 in the Iranian ASMA region. The column for the year 2012 is identical to the corresponding panels in Figs. S4, S5.



## References

- Deckert, R., Jöckel, P., Grewe, V., Gottschaldt, K., and Hoor, P.: A quasi chemistry-transport model mode for EMAC, *Geoscientific Model Development*, 4, 195-206, 10.5194/gmd-4-195-2011, 2011.
- Jöckel, P., Tost, H., Pozzer, A., Kunze, M., Kirner, O., Brenninkmeijer, C. A. M., Brinkop, S., Cai, D. S., Dyroff, C., Eckstein, J., Frank, F., Garny, H., Gottschaldt, K., Graf, P., Grewe, V., Kerkweg, A., Kern, B., Matthes, S., Mertens, M., Meul, S., Neumaier, M., Nützel, M., Oberländer-Hayn, S., Ruhnke, R., Runde, T., Sander, R., Scharffe, D., and Zahn, A.: Earth System Chemistry Integrated Modelling (ESCiMo) with the Modular Earth Submodel System (MESSy, version 2.51), *Geosci. Model Dev. Discuss.*, 8, 8635–8750, 10.5194/gmdd-8-8635-2015, 2015.
